# Supplementary material for: Does affective polarization make citizens more extreme? Experimental evidence from Chile
Source: Research Square preprint supplement (doi:10.21203/rs.3.rs-8704872/v1), 2026-02-16
Supplement: Supplementary file 1 [file 087e43f1e2b5fc9ec28e000c.docx]

**APPENDIX**

**Table of Contents**

[APPENDIX A: Descriptive evidence and measurement: additional tables and figures 1](#_Toc209881369)

[Table A.1: Distribution of requested quotas to Netquest 1](#_Toc209881370)

[Table A.2: Question wording 2](#_Toc209881371)

[Table A.3: Words related to four relevant policy areas and news misinformation (benchmark) 4](#_Toc209881372)

[Figure A.1: Affective polarization levels by plebiscite choice, runoff vote, left-right divide, rich-poor, and abortion divide by plebiscite choice (Original survey: Placebo group) 5](#_Toc209881373)

[APPENDIX B: Additional experimental results 6](#_Toc209881374)

[Figure B.1: Keyness analysis: Differences in feelings toward the opposite group among respondents with a plebiscite choice in the treated and control groups, by plebiscite vote 6](#_Toc209881375)

[Figure B.2: Keyness analysis: Differences in answers to priming question by plebiscite position 7](#_Toc209881376)

[Table B.1: Effect of plebiscite cues on agreement with ideological statements 8](#_Toc209881377)

[Table B.2: Effect of treatment on affective polarization (manipulation checks) 9](#_Toc209881378)

[Table B.3: Treatment effect on ideological polarization 10](#_Toc209881379)

[Table B4: Affective polarization and the effect of cues on agreement with ideological statements (different specifications) 11](#_Toc209881380)

[APPENDIX C: Construction of population weights 12](#_Toc209881381)

[Table C.1: Population and unweighted sample distributions 12](#_Toc209881382)

# **APPENDIX A: Descriptive evidence and measurement: additional tables and figures**

## Table A.1: Distribution of requested quotas to Netquest


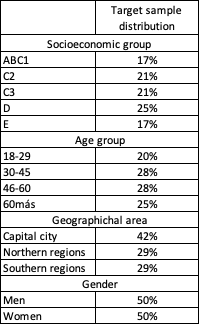


Note: Summary of quotas used to construct weights for the descriptive analysis.

## **Table A.2: Question wording online survey**

| QUESTION | CREATED  VARIABLE | QUESTION ALTERNATIVES | SURVEY |
| --- | --- | --- | --- |
| **CHARACTERIZATION** | | | |
| Did you vote in the most recent presidential election in December 2021? | Voted Presidential | Yes  No | Both |
| [Voted Presidential =Yes]  Which candidate did you vote for in the second round of the December 2021 presidential election?  Gabriel Boric Font  José Antonio Kast Rist | Presidential vote choice | Yes  No | CEP survey |
| [Voted Presidential =Yes]  Who did you vote for? | Presidential vote choice | Gabriel Boric Font  José Antonio Kast Rist  Voted blank  Cast a null/invalid vote | Original online survey |
| Thinking about the exit plebiscite to be held on September 4 of this year, do you plan to vote **Approve**or **Reject** the proposed new constitution? | Plebiscite choice | Approve  Reject  I will cast a blank or null vote  Don’t know  I will probably not vote | Original online survey |
| On September 4, 2022, the exit plebiscite on the proposed new Constitution was held. Did you vote in that election?  Yes  No | Voted plebiscite | Yes  No | CEP survey |
| [Voted plebiscite=Yes]  Could you tell me which option you voted for in the September exit plebiscite? | Plebiscite choice | Approve  Reject | CEP survey |

| **IDEOLOGICAL POLARIZATION** | | | |
| --- | --- | --- | --- |
| Where would you place yourself on the following scale where 0 represents the left and 10 represents the right: | Left–Right | 0–10 scale  0: Left  10: Right | Online  original  survey |
| The concepts of left and right are useful for summarizing, in a very simplified way, what people think about many issues. I would like you, please, to place yourself on a scale from 1 to 10, where 1 represents the left and 10 represents the right. | Left–Right | 1-10 scale  1: Left  10_ Right | CEP survey |
| Regarding **taxes**, where would you place yourself on a scale from 0 to 10, where 0 means that taxes should be strongly reduced and 10 means that taxes should be strongly increased? | Taxes | 0–10 scale  0: Strongly reduced  10: Strongly increased | Online  original  survey |
| Regarding **inequality and economic growth,** where would you place yourself on a scale from 0 to 10, where 0 means that the reduction of inequalities should be prioritized, even if economic growth is not generated, and 10 means that economic growth should be prioritized, even if inequality increases? | Inequality vs. Growth | 0–10 scale  0: Prioritize the reduction of inequalities  10: Prioritize economic growth | Online  original  survey |
| In democracies, the aspiration is for there to be public and private **freedoms** and for there to be **public order and citizen security**. In your case, which value do you give more relevance to? Where 0 is “Let there be public and private freedom” and 10 is “Let there be public order and citizen security.” | Liberty vs. Security | 0–10 scale  0: Public and private liberties  10: Public order and security | Online  original  survey |
| Regarding **abortion**, where would you place yourself on the following scale where 0 means that abortion should never be allowed and 10 means that abortion should always be allowed? | Abortion | 0–10 scale  0: Abortion never allowed  10: Abortion always allowed | Online  original  survey |
| Where would you place yourself on the following scale in which 0 means that the state must ensure the **jobs** and **standard of living** of the people, and 10 means individuals are responsible for their own jobs and standard of living? | Government vs. Individuals | 0–10 scale  0: State responsibility  10: Individual responsibility | Online  original  survey |

| **AFFECTIVE POLARIZATION** | | | |
| --- | --- | --- | --- |
| Up next, some groups of people are shown. On a scale from 0 to 10, where 0 indicates that you have a very negative opinion of these people, 5 that you have neither a negative nor a positive opinion, and 10 that you have a very positive opinion about these people, what is your opinion about each group of people? | | |  |
| People who vote for Approve  People who vote for Reject | Plebiscite voters | 0–10 scale  0: Very negative  5 Neither positive nor negative  10: Very positive | Both |
| People who voted for Gabriel Boric  People who voted for José Antonio Kast | Presidential voters | Both |
| Right-wing people  Left-wing people | Left–Right | Both |
| The rich  The poor | Rich–Poor | Original online survey |
| People in favor of unrestricted abortion  People against abortion under any circumstance | Pro-choice vs. Pro-life | Original online survey |
| Using the same scale, where 0 means you strongly disagree and 10 means you strongly agree, how much do you agree with the following statements? | | |  |
| People who vote **Approve** are not only worse for politics; they are frankly bad people.  eople who vote **Reject**are not only worse for politics; they are frankly bad people. | Bad vs Good | 0-10 scale  0: Strongly disagree  10: Strongly agree | Original online survey |
| People who vote **Approve** are a serious threat to Chile and its people.  People who vote **Reject** are a serious threat to Chile and its people. | Threat | Original online survey |
| Now thinking of a scale where 0 means they are very bad people, 5 means they are neither good nor bad people, and 10 means they are very good people, where would you place the people who voted | | |  |
| People who vote for Approve  People who vote for Reject | Bad vs Good | 0-10 scale  0: Very bad person  10: Very good person | CEP Survey |

## Table A.3: Words related to four relevant policy areas and news misinformation (benchmark)

| **Inequality/Growth** | **Abortion** | **Environment** | **Indigenous** | **Benchmark** |
| --- | --- | --- | --- | --- |
| inequality | abortion | environment | indigenous | news |
| growth | reproductive | green | mapuche | fake |
| taxes | abort | ecology | race | lie |
| unequal | right to life | earth | native people | inform |
| job | women rights | planet | multicultural | Information |
| employment | life | drought | plurinational | naivety |
| unemployment | women | climate | mapudungun | liars |
| economy |  | weather |  | deception |
| equality |  | environmental |  | cheat |
| equal |  | permissions |  | ignorance |
|  |  |  |  | read |
|  |  |  |  | true |
|  |  |  |  | false |
|  |  |  |  |  |
|  |  |  |  |  |
|  |  |  |  |  |

## Figure A.1: Affective polarization levels by plebiscite choice, runoff vote, left-right divide, rich-poor, and abortion divide by plebiscite choice (Original survey: Placebo group)


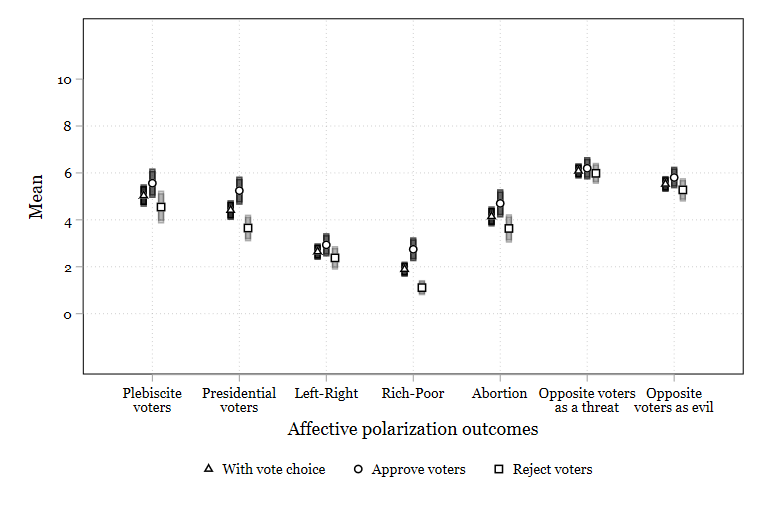


Note: Means for the placebo group using weights by population group, only for respondents with a plebiscite choice (n=661).

Source: Original online survey

# **APPENDIX B: Additional experimental results**

## Figure B.1: Keyness analysis: Differences in feelings toward the opposite group among respondents with a plebiscite choice in the treated and control groups, by plebiscite vote


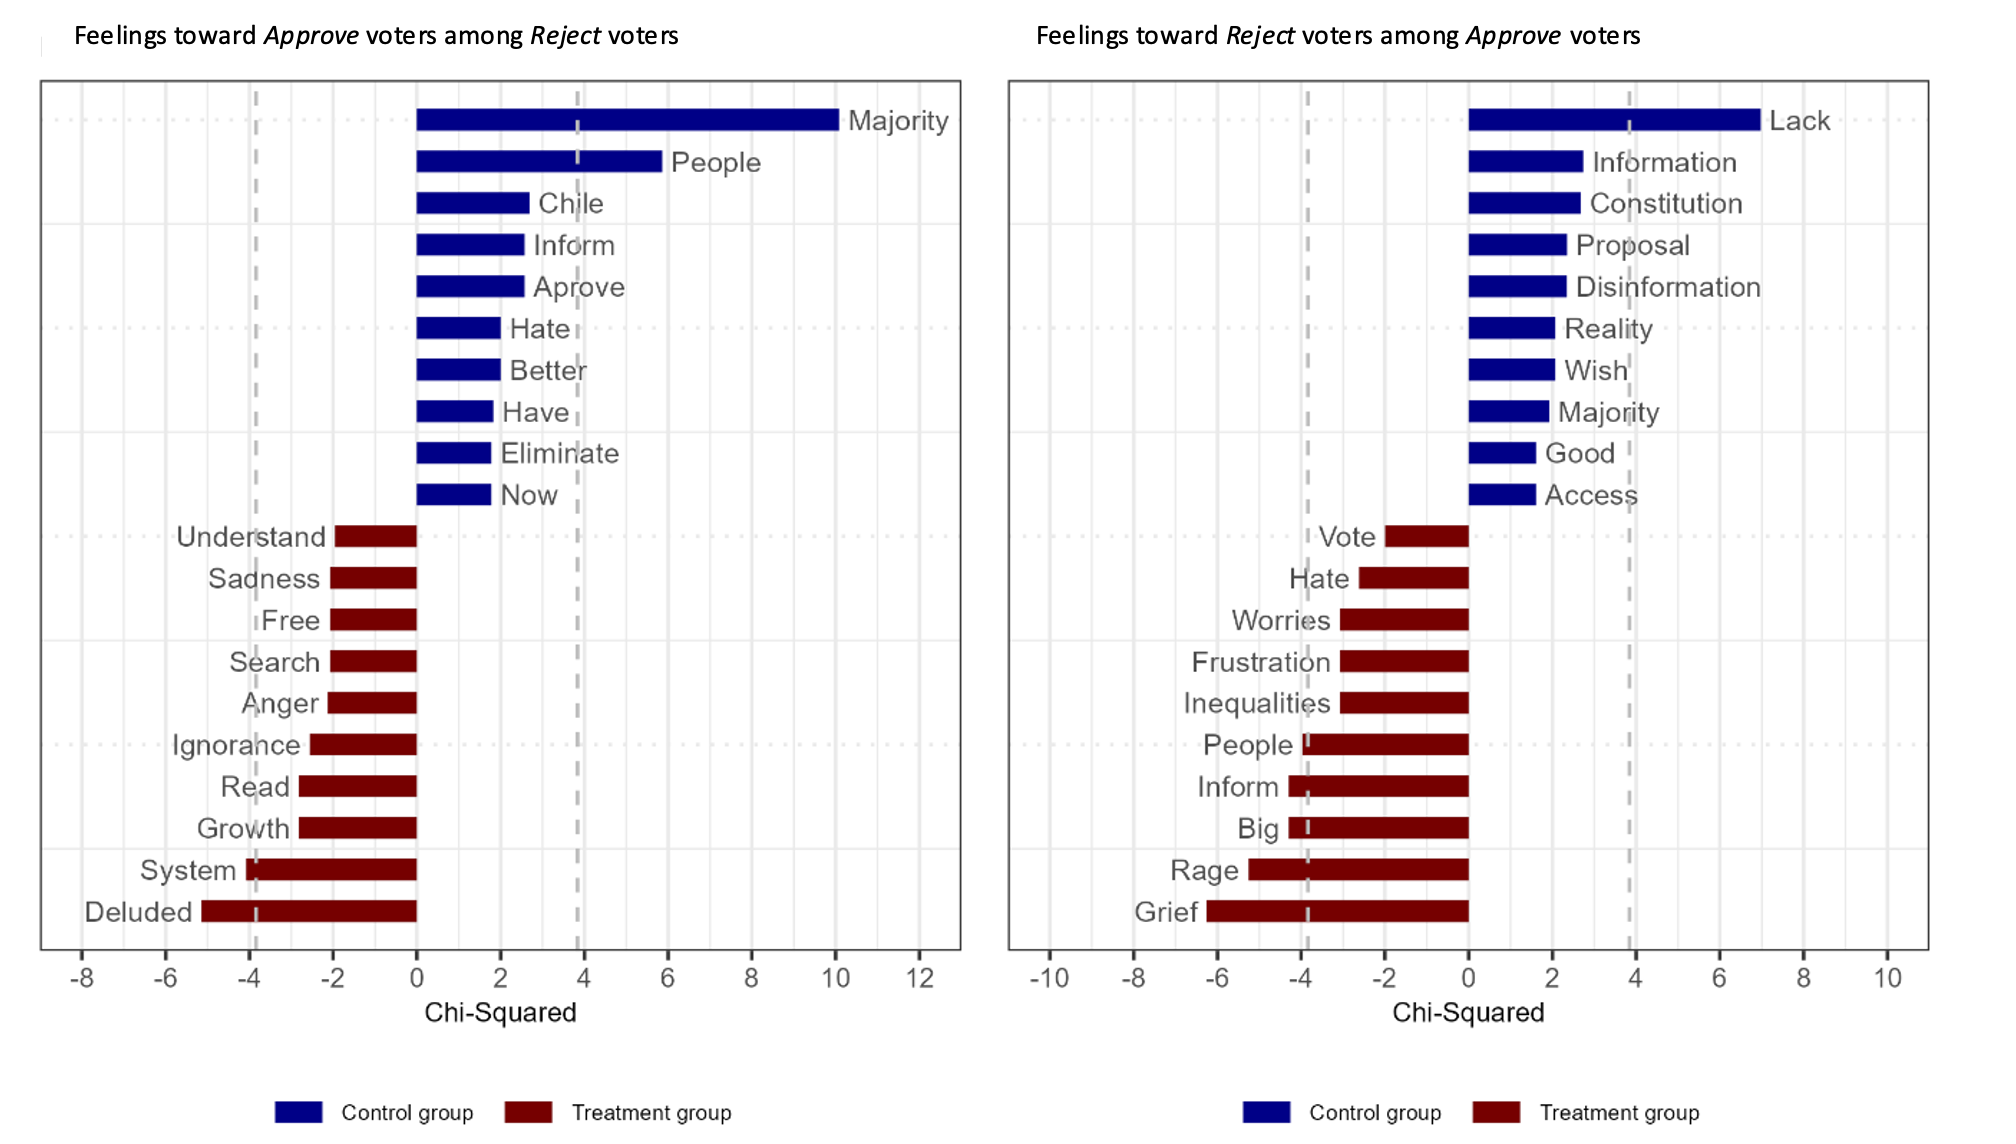


Note: Dashed lines represent 95 percent significance levels (|| > 3.84).

## Figure B.2: Keyness analysis: Differences in answers to priming question by plebiscite position


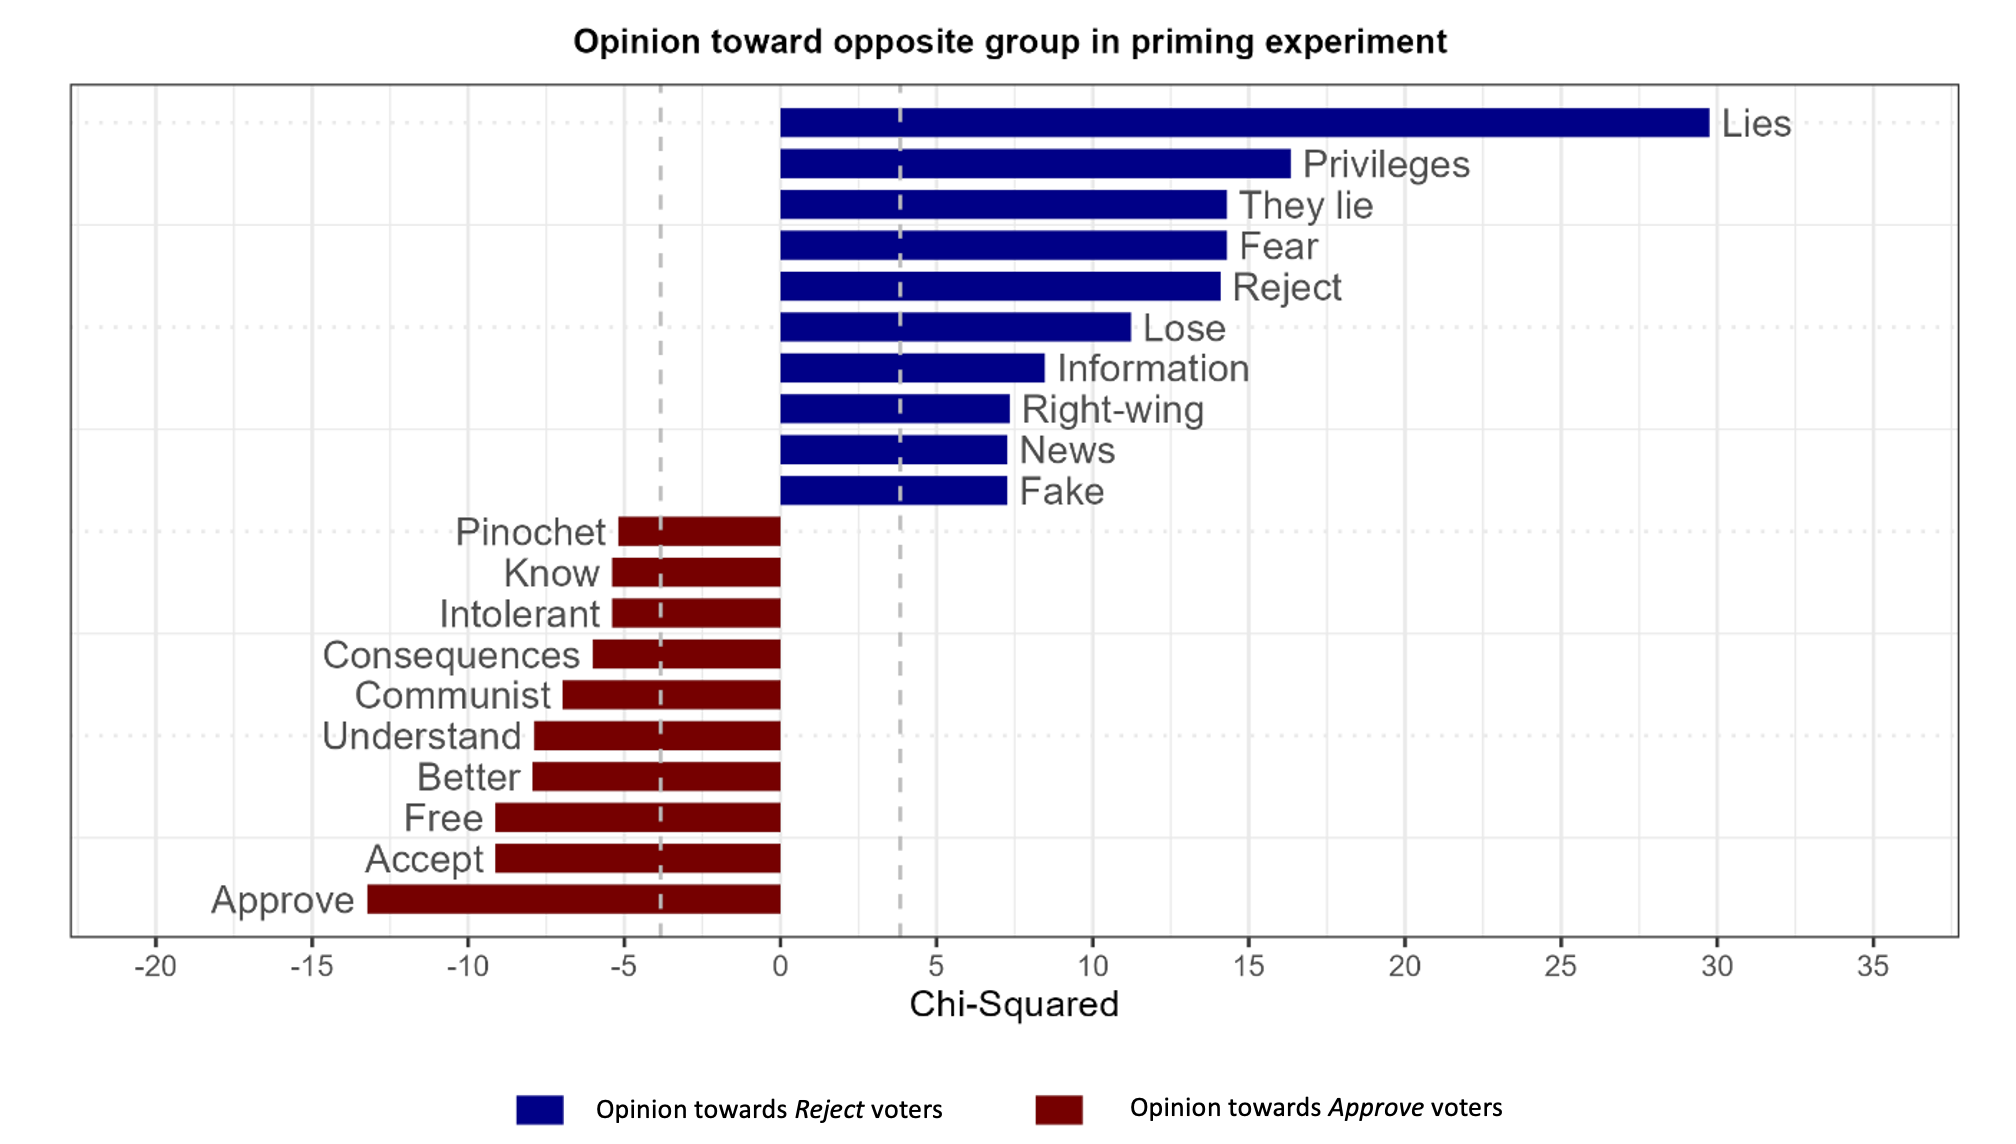


Note: Dashed lines represent 95 percent significance levels (|| > 3.84).

## Table B.1: Effect of plebiscite cues on agreement with ideological statements


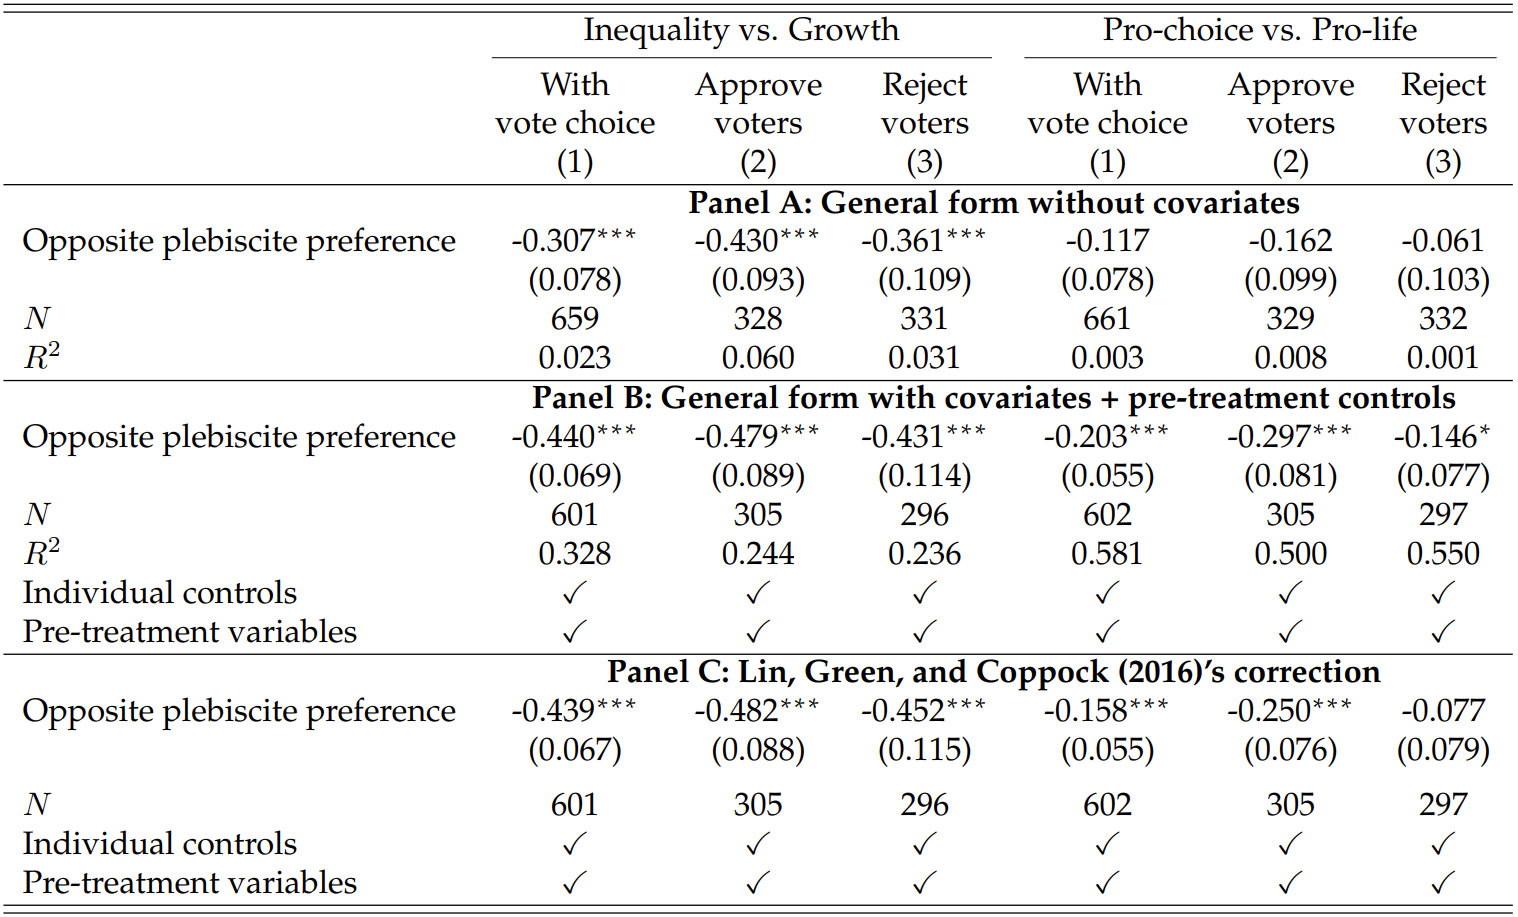


Note: Outcomes are standardized. Only respondents from the placebo group with vote preferences for the plebiscite are included. All regressions control for sociodemographic variables (age, sex, metropolitan region, education, and socioeconomic status), left–right ideology (in three groups), interest in politics, party ID, and baseline preferences for the past presidential runoff and plebiscite.

Robust standard errors are in parentheses. *p<0.10, **p<0.05, ***p<0.01

## Table B.2: Effect of treatment on affective polarization (manipulation checks)


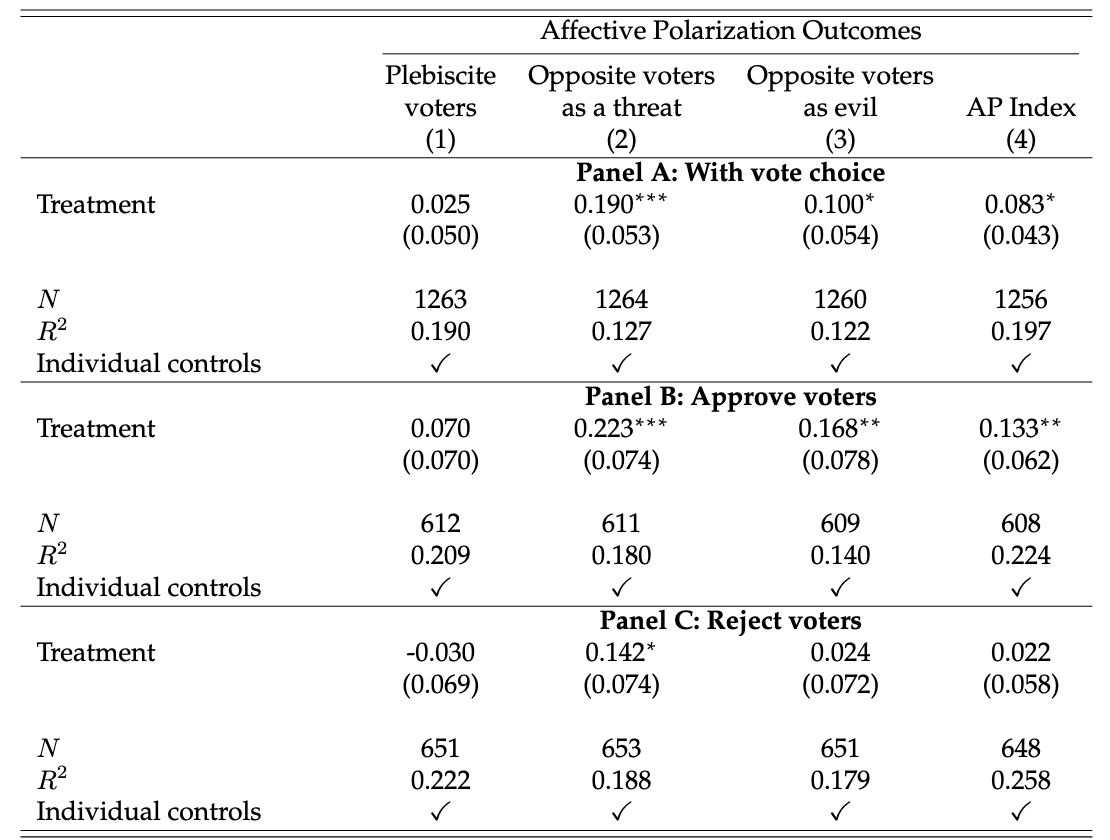


Note: OLS regressions, outcomes are standardized. All regressions control for sociodemographic variables (age, sex, metropolitan region, education, and socioeconomic status), left–right ideology (in three groups), interest in politics, party ID, and baseline preferences for the past presidential runoff and plebiscite.

Robust standard errors are in parentheses. *p<0.10, **p<0.05, ***p<0.01

## Table B.3: Treatment effect on ideological polarization


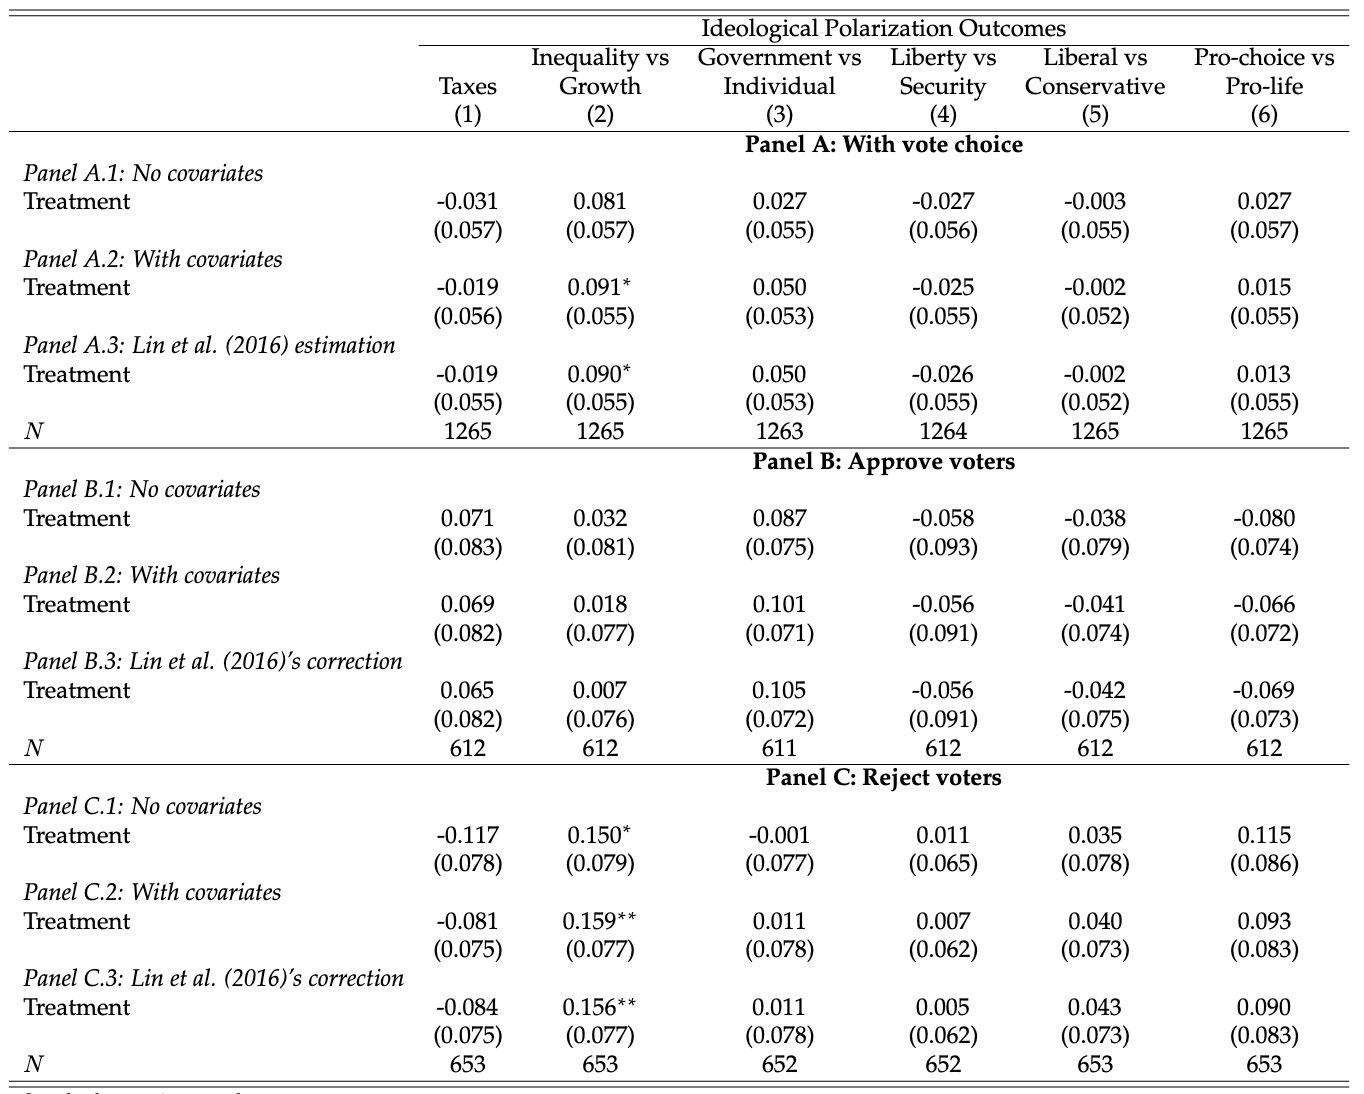


Note: OLS regressions, all control for sociodemographic variables (age, sex, region, education, and socioeconomic status), left–right ideology (in three groups), interest in politics, party ID, and baseline preferences for the past presidential runoff and plebiscite.

## Table B4: Affective polarization and the effect of cues on agreement with ideological statements (different specifications)


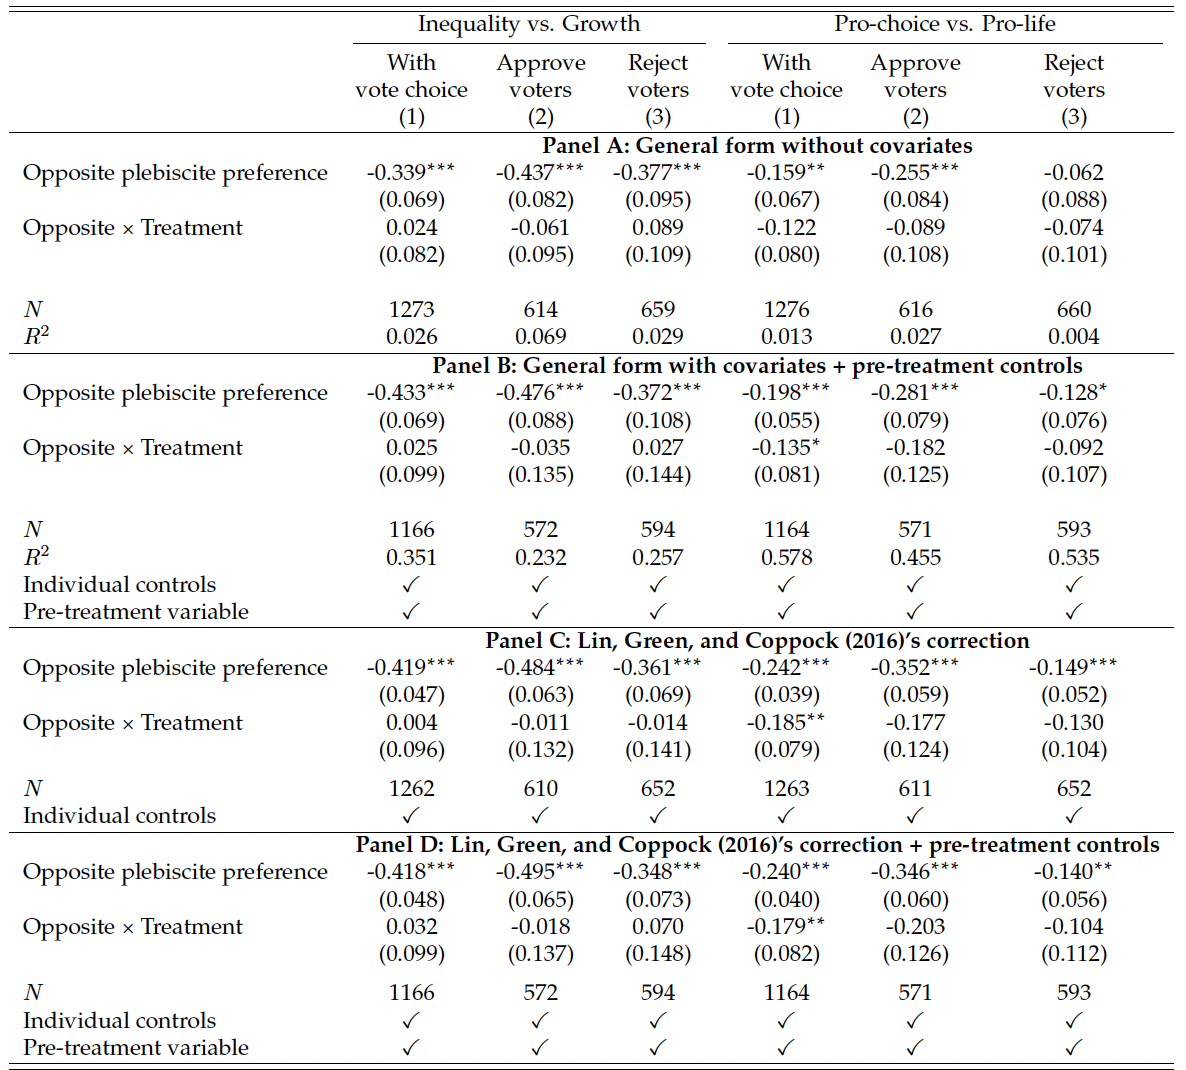


Note: Outcomes are standardized. All regressions control for sociodemographic variables (age, sex, metropolitan region, education, and socioeconomic status), left–right ideology (in three groups), interest in politics, party ID, and baseline preferences for the past presidential runoff and plebiscite.

Robust standard errors are in parentheses. *p<0.10, **p<0.05, ***p<0.01

# **APPENDIX C: Construction of population weights**

Post-survey weights were constructed based on the population distribution obtained from the 2017 Chilean Census. Each stratum corresponds to a subgroup given by the combination of education level, age group, and gender. We identify three education categories: "less than complete secondary education," "complete secondary education," and "more than complete secondary education"; three age groups: "18-35 years old," "36-55 years old," and "over 55 years old," and two gender categories. The combination of all three variables resulted in 18 strata. For each stratum, weights were calculated as:

where

- Ni: population size in stratum i
- ni: final sample size in stratum i
- n: total sample size.

Table C.1 presents the population distribution and unweighted distribution (by construction, the weighted distribution corresponds to the population distribution).

## **Table C.1: Population and unweighted sample distributions**

| **Variable** | **Division** | **Census** | **Survey** |
| --- | --- | --- | --- |
| Education | <Secondary complete | 36.3% | 8.9% |
| Secondary complete | 34.0% | 32.9% |
| >Secondary complete | 29.8% | 58.3% |
| Age | 18–35 | 37.0% | 22.4% |
| 36–54 | 35.4% | 41.7% |
| >54 | 27.6% | 35.9% |
| Sex | Male | 48.3% | 49.0% |
| Female | 51.7% | 51.0% |
|  | N | 13,314,848 | 1,499 |
